# Transcriptome Analysis of Differentially Expressed Genes Relevant to Variegation in Peach Flowers

Yingnan Chen<sup>1</sup>\*, Yan Mao<sup>1</sup>\*, Hailin Liu<sup>1</sup>\*, Faxin Yu<sup>2</sup>, Shuxian Li<sup>1</sup>, Tongming Yin<sup>1</sup>\*

**1** The Southern Modern Forestry Collaborative Innovation Center, Nanjing Forestry University, Nanjing, Jiangsu, China, **2** Institute of Biology and Resources, Jiangxi Academy of Sciences, Nanchang, Jiangxi, China

## Abstract

**Background:** Variegation in flower color is commonly observed in many plant species and also occurs on ornamental peaches (*Prunus persica* f. *versicolor* [Sieb.] Voss). Variegated plants are highly valuable in the floricultural market. To gain a global perspective on genes differentially expressed in variegated peach flowers, we performed large-scale transcriptome sequencing of white and red petals separately collected from a variegated peach tree.

**Results:** A total of 1,556,597 high-quality reads were obtained, with an average read length of 445 bp. The ESTs were assembled into 16,530 contigs and 42,050 singletons. The resulting unigenes covered about 60% of total predicted genes in the peach genome. These unigenes were further subjected to functional annotation and biochemical pathway analysis. Digital expression analysis identified a total of 514 genes differentially expressed between red and white flower petals. Since peach flower coloration is determined by the expression and regulation of structural genes relevant to flavonoid biosynthesis, a detailed examination detected four key structural genes, including *C4H*, *CHS*, *CHI* and *F3H*, expressed at a significantly higher level in red than in white petal. Except for the structural genes, we also detected 11 differentially expressed regulatory genes relating to flavonoid biosynthesis. Using the differentially expressed structural genes as the test objects, we validated the digital expression results by using quantitative real-time PCR, and the differential expression of *C4H*, *CHS* and *F3H* were confirmed.

**Conclusion:** In this study, we generated a large EST collection from flower petals of a variegated peach. By digital expression analysis, we identified an informative list of candidate genes associated with variegation in peach flowers, which offered a unique opportunity to uncover the genetic mechanisms underlying flower color variegation.

**Citation:** Chen Y, Mao Y, Liu H, Yu F, Li S, et al. (2014) Transcriptome Analysis of Differentially Expressed Genes Relevant to Variegation in Peach Flowers. PLoS ONE 9(3): e90842. doi:10.1371/journal.pone.0090842

**Editor:** Christian Schönbach, Nazarbayev University, Kazakhstan

**Received:** October 13, 2013; **Accepted:** February 6, 2014; **Published:** March 6, 2014

**Copyright:** © 2014 Chen et al. This is an open-access article distributed under the terms of the Creative Commons Attribution License, which permits unrestricted use, distribution, and reproduction in any medium, provided the original author and source are credited.

**Funding:** Funding for this research was provided by the Natural Science Foundation of China (31270711 and 31125008), the Jiangsu Natural Science Foundation for Youth (BK20130968), and the Program for Innovative Research Team in Universities of Jiangsu Province and the Educational Department of China. It was also funded by the Priority Academic Program Development of Jiangsu Higher Education Institutions. The funders had no role in study design, data collection and analysis, decision to publish, or preparation of the manuscript.

**Competing Interests:** The authors have declared that no competing interests exist.

\* E-mail: tmyin@njfu.com.cn

† These authors contributed equally to this work.

## Background

Flower color is of paramount importance in plant biology [1]. Three major groups of pigments—betalains, carotenoids and flavonoids—are responsible for the attractive natural display of flower colors [2,3]. Flavonoids, particularly anthocyanidins, are the most common flower pigments, and contribute to a wide range of colors, from pale yellow to red, purple and blue [4]. To date, most enzymes involved in the anthocyanin biosynthetic pathway have been identified in various plant species [5–7]. All anthocyanidins are derived from a general phenylpropanoid pathway that converts the aromatic amino acid phenylalanine to anthocyanidins through a series of enzyme-catalyzed reactions [8–12]. During the past few decades, much of the molecular information available on the regulation and biosynthesis of flower pigments has been derived from studies performed in model systems such as *Zea mays* L. (maize) [13,14], *Arabidopsis* [6,15], petunia [16,17] and snapdragon [3,15]. An increasing number of non-classical plants,

however, are providing unique insights into molecular mechanisms involved in flower pigment formation, leading to further understanding of how flower color varies among wild species [18–20].

Ornamental peach, a member of the *Rosaceae* family, is an important horticultural tree. *Prunus persica* f. *versicolor* (Sieb.) Voss, one of the main varieties, is characterized by the presence of chimeric flowers (Figure 1). Because variegation in flowers often attracts consumer attention, variegated plants are generally of high value in the ornamental market. This unstable phenotype has been observed in natural populations of petunia, snapdragon, morning glory, azalea and other plant species [21]. Flower variegation is usually due to the presence of a group of colored cells descended from a single ancestral cell in which a somatic mutation from the recessive white to the pigmented revertant allele has occurred. Somatic mutation frequency and timing during petal development determine variegation patterns [22].

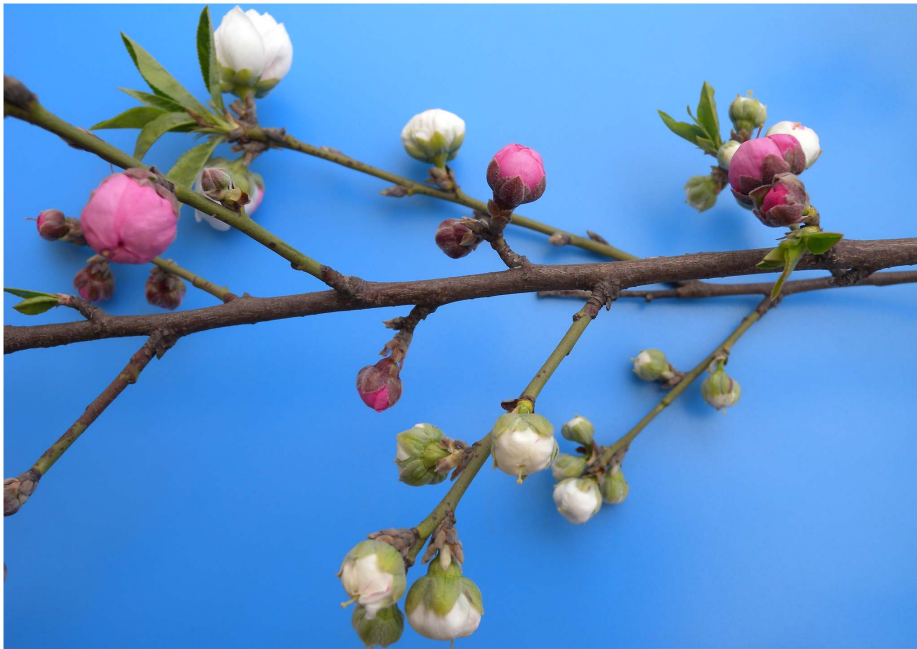

**Figure 1. Sampling stage of variegated flower petals.**  
doi:10.1371/journal.pone.0090842.g001

Molecular mechanisms of flower variegation have been investigated in various plant species [22–25]. Some of this variegation is caused by transposable element insertion into structural genes associated with the anthocyanin synthetic pathway [26–28]. Because of the complexity of the flavonoid biosynthetic pathway, however, the exact genetic mechanisms underlying the generation of flower pigmentation chimeras may differ among species. Chaparro et al. [29] studied variegation in anthocyanin production in both vegetative and reproductive tissues of the peach cultivar Pillar; they verified that this phenotype is heritable, although the degree of variegation differed according to the genetic background of outcross progeny. The genetic mechanisms in peach responsible for this unstable phenotype have not yet been elucidated. The whole peach genome has been sequenced [30], and abundant transcriptome sequences are available to the public [31]. The reference genome and large EST collection enhance our ability to align sequences, identify genes, and characterize transcriptomes, thereby facilitating identification of the genetic basis of variegated pigmentation in peach.

To understand the mechanism of variegated pigmentation, detection of differentially expressed genes from different-colored flowers is essential. Transcriptome sequencing is an efficient way to measure transcriptome composition and uncover differentially expressed genes [32–34]. Many studies using high-throughput next-generation sequencing technology have surveyed the complex transcriptomes of various plants including *Arabidopsis thaliana* [35], *Digitalis purpurea* [36], *Carthamus tinctorius* [37], *Persea americana* [38] and *Salix suchowensis* [39]. In this study, transcriptomes of white and red flower petals sampled from a *Prunus persica* f. *versicolor* individual were sequenced using a 454 GS-FLX sequencer. By analyzing the data with various bioinformatics tools, we aimed to discover candidate genes involved in peach flower variegation.

## Materials and Methods

### Plant Material

We separately collected petals of expanded but unflushed white and red variegated flower buds (Figure 1) from a tree of *Prunus persica* f. *versicolor* in Nanjing Lovers Garden, Jiangsu, China in March 2012. Petals were immediately frozen in liquid nitrogen and stored at  $-80^{\circ}\text{C}$  until RNA extraction. The field studies did not involve any endangered or protected species, and sample collection was authorized by the administration office of Nanjing Lovers Garden.

### RNA Extraction and cDNA Synthesis

Total RNA was extracted separately from white and red petals using the CTAB method [39]. RNA integrity was confirmed by 1% agarose gel electrophoresis. After digestion with DNase (Takara) at  $37^{\circ}\text{C}$  for 30 min to remove DNA residues, RNA concentration was determined using a Nanodrop spectrophotometer (Thermo). mRNA was then purified from total RNA using an Oligotex mRNA midi kit (Qiagen), with its quality assessed using an Agilent Technologies 2100 Bioanalyzer (Agilent). cDNA synthesis was performed using the 454 cDNA amplification technique with a cDNA Synthesis System kit (Roche) following the manufacturer's protocol.

### Sequencing Library Construction and 454 Sequencing

Sequencing libraries were separately constructed for white and red petals using a Rapid Library Prep kit (Roche). Quality of sequencing libraries was checked using an Agilent 2100 Bioanalyzer. Approximately 2.1 million beads per flower color were separately loaded onto two sections of a pico-titer plate. A sequencing run was carried out on a Roche 454 GS FLX sequencer at Nanjing Forestry University. All ESTs in this study were deposited in NCBI with an accession number SRR1037160.

## EST Sequence Processing and Assembly

Raw 454 sequence files in SFF format were base-called using the Pyrobayes base caller [40]. In addition, 78,689 peach ESTs were downloaded from GenBank in February 2012. The 454 sequencing data and GenBank ESTs were processed with GS FLX v2.0.01 software (454 Life Sciences, Roche) to remove low-quality and adaptor sequences. To remove possible contamination, the resulting high-quality 454 and GenBank sequences were screened against the NCBI UniVec database, *E. coli* genome sequences, and peach ribosomal RNA and chloroplast genome sequences. Sequences shorter than 50 bp were discarded before assembly. Finally, the processed 454 and GenBank sequences were assembled into putative transcripts (including contigs and singletons) using the 454 assembly program Newbler v2.7 with the following overlap detection settings: seed step, 12; seed length, 16; seed count, 1; minimum overlap length, 40; minimum overlap identity, 95%; alignment identity score, 2; alignment difference score, -3. We parsed the 454 ReadStatus.txt file to identify singletons, which were unassembled reads. The contig and singleton files were used to generate a unigene file.

## Mapping Unigenes to Peach Genome Predicted Genes

The generated unigenes were aligned to predicted genes of the peach genome using BLAST [41]. Based on the International Peach Genome Initiative (IPGI; [http://www.rosaceae.org/species/prunus/prunus\\_persica](http://www.rosaceae.org/species/prunus/prunus_persica)), there are 27,864 predicted genes in the peach genome. Because the number of obtained unigenes was much greater than the number of predicted genes, it is possible that different unigenes were segments of the same predicted gene. In this study, unigenes mapping to the same predicted gene were integrated into one unique gene, which was used to collect transcript count information for detection of differentially expressed genes in white and red flower petals.

## Gene Annotation and Pathway Prediction

Unigene annotation was performed by BLASTX analysis [42] against peach protein (<http://www.phytozome.com/peach.php>; v2.0), NCBI non-redundant protein (nr) and UniProt databases using a cutoff *E*-value of  $10^{-5}$ . Gene Ontology (GO) terms were assigned to each unigene based on GO annotations of its corresponding homologs in the UniProt database [43], and, using interpro2go and pfam2go mapping files available on the GO website (<http://www.geneontology.org>), their corresponding InterPro and Pfam domains. GO mapping results were further plotted by uploading the GO list file to the Web Gene Ontology Annotation Plot (WEGO) website (<http://wego.genomics.org.cn/cgi-bin/wego/index.pl>). The detailed annotation was then used to retrieve keywords for identification of flower pigmentation-related genes.

The KEGG Automatic Annotation Server (KAAS; <http://www.genome.jp/tools/kaas/>) was employed to perform metabolic pathway mapping [44,45]. KAAS assigned each peach gene a KEGG Orthology (KO) number, which was then used for mapping to a KEGG reference metabolic pathway.

## Differentially Expressed Genes between White and Red Petals

Following cDNA sequence assembly and gene prediction, transcript count information was collected for sequences corresponding to each predicted gene associated with a flower petal color. To obtain relative expression levels in each sample, transcript counts were normalized to the total number of produced transcripts per sample. Significance of gene differential expression

level was assessed using R [46],  $\chi^2$  and Fisher exact tests as implemented in the publicly available web tool IDEG6 (<http://telathon.bio.unipd.it/bioinfo/IDEG6/>) [47]. A gene was considered to be differentially expressed when results from the above tests were all significant at a level of  $P \leq 0.0001$ .

## Quantitative Real-time PCR Analysis

Total RNA was extracted from red and white flower petals as described above. Approximately 2  $\mu$ g of total RNA per sample was treated with DNaseI (Takara), and then subjected to reverse transcript to cDNA using reverse transcription system (Promega). The quantitative real-time PCR (qRT-PCR) was performed using Applied Biosystems 7500 Real-time PCR system (Applied Biosystems) with SYBR Premix Ex Taq (Takara). Each reaction contained 2  $\mu$ L the first-strand cDNA as template, in a total volume of 20  $\mu$ L reaction mixture. The amplification program was performed as 95°C 30 s followed by 95°C for 5 s and 60°C for 34 s (40 cycles). Gene-specific primers, shown in Table S3, were used for detecting the relative quantification of each gene. qRT-PCR expression levels were compared based on the mean of three independent experimental repeats. Calculation of relative expression level was performed using the  $2^{-\Delta\Delta CT}$  method [48]. *TEF2* was used as an internal control for normalization [49].

## Results

### Transcriptome Sequencing and Assembly

A half 454 GS-FLX run was performed for each sample, resulting in the generation of 1,556,684 reads. After quality control, 1,556,597 reads with an average length of 1, 445 bp remained: 837,041 from white petals and 719,556 from red petals (Table 1). These reads, together with 76,822 high-quality GenBank ESTs, were subjected to assembly analysis. Sequence assembly yielded 58,580 unigenes comprising 16,530 contigs and 42,050 singletons. Contigs and singletons had average lengths of 1,555 bp and 364 bp, respectively (Table 2). A plot of unigene length distribution revealed that most unigenes (82.8%) were longer than 300 bp (Figure 2). From our EST collection, we were able to identify a number of highly expressed unigenes in peach flowers (Figure 3). Approximately 12,589 unigenes were assembled from more than 10 EST reads; these unigenes (~21% of all unigenes) corresponded to ~95% of total EST reads.

### Mapping Unigenes to Predicted Genes in the Peach Genome

Using the peach genome (v1.0; IPGI), approximately 70% (40,687) of obtained unigenes could be mapped to predicted genes of *P. persica*. Among these, 15,645 were contigs (95% of all contigs) and 25,042 were singletons (60% of singletons). The mapped unigenes were aligned to 16,733 predicted genes, corresponding to approximately 60% of the 27,864 predicted genes in the peach genome. The remaining 17,893 unigenes could not be mapped to any predicted genes. Among the unmappable unigenes, 885 were contigs and 17,008 were singletons (Table 2). We further examined the unmappable unigenes, and found that about 20.6% had no significant matches with plant sequences. In total, alignment of unigenes to predicted *P. persica* genes generated 34,626 unique genes: 16,733 identified as peach genome predicted genes and 17,893 unmappable unigenes. When unigenes were mapped to different scaffolds of the peach genome ([http://www.rosaceae.org/species/prunus/prunus\\_persica](http://www.rosaceae.org/species/prunus/prunus_persica)), the number of mapped unigenes was found to be highly correlated with the number of predicted genes on each scaffold (paired t-test,  $R^2 = 0.992$ ) (Figure 4). The number of expressed genes was thus

**Table 1.** Statistics for peach ESTs generated by 454 GS-FLX sequencing.

|                               | Red petals  | White petals | Total       |
|-------------------------------|-------------|--------------|-------------|
| Number of reads               | 719,556     | 837,041      | 1,556,597   |
| Average read length (bp)      | 443.3       | 448          | 445.8       |
| Total bases (bp)              | 318,983,491 | 374,962,455  | 693,945,946 |
| Number of reads in contigs    | 675,990     | 783,159      | 1,459,149   |
| Number of reads as singletons | 28,444      | 35,141       | 63,585      |

doi:10.1371/journal.pone.0090842.t001

proportional to the number of predicted genes allocated to each scaffold.

**Functional Annotation of Peach Transcriptomes**

Based on alignments of unigenes to peach genome predicted genes, 34,626 unique genes were identified. To infer putative functions of these unique genes, we blasted their sequences against the GenBank nr database using a significance cutoff of  $E \leq 10^{-5}$ . The analysis indicated that 21,663 unique genes (63%) had significant matches to the nr database, among which 15,846 were peach genome predicted genes (94.7% of the 16,733 unigene-matched predicted genes) and 5,817 were unmappable unigenes (32% of all unmappable unigenes). Most of the unmappable unigenes were singletons (95.1%), which were much shorter than contigs (364 bp vs. 1,555 bp on average). In general, the longer the sequence is, the greater the chance of annotation, and thus the more number of GO terms that can be recovered [50]. This suggests that the inability to assign putative functions to most unmappable unigenes was due to the absence of conserved functional domains in short sequences.

Gene Ontology (GO) describes gene products in terms of their associated molecular functions, biological processes and cellular components. To assign putative functional roles to the obtained unique genes, GO terms were assigned based on sequence similarities to known GO-annotated proteins (and their InterPro and Pfam domains) in the UniProt database. As a result, 10,485 unique genes were assigned at least one GO term. Among GO terms, 896 were in the biological process category, 606 in the molecular function category, and 607 in the cellular component category (Figure 5). These unique genes were further displayed using a set of GO slims, which are a list of high-level GO terms providing a broad overview of ontology content (<http://www.geneontology.org/GO.slims.shtml>). Figure 5 displays the function-

al classification of peach unique genes into plant-specific GO slims within cellular component, molecular function and biological process categories. Genes involved in cell, cell part, binding, catalytic, cellular process and metabolic process categories were the highest-represented groups, indicating that flower buds were undergoing rapid growth and carrying out intensive metabolic activities. In the biological process category, it is noteworthy that genes involved in pigmentation were also highly represented, indicating active pigmentation activities.

**Biochemical Pathways**

KEGG, an alternative functional gene annotation system, performs assignments based on Enzyme Commission (EC) numbers of genes associated with biochemical pathways. To further demonstrate the usefulness of the generated peach ESTs for discovering flower pigmentation-related genes, we identified biochemical pathways represented by our EST collection. Annotations of peach unique genes were fed into the Pathway Tools program (KAAS; <http://www.genome.jp/tools/kaas/>). This process predicted 229 pathways represented by a total of 5,345 unique genes. Of these KEGG-annotated genes, 2,425 (45.4%) were involved in metabolism, 1,186 (22.2%) in genetic information processing, 346 (6.5%) in environmental information processing, 569 (10.6%) in cellular processes and 792 (14.8%) in organism systems (Table S1). Among genes involved in metabolism, 14 genes were found to encode key enzymes involved in flavonoid biosynthesis. We mapped and highlighted these genes onto the “flavonoid biosynthesis” pathway (Figure S1), which demonstrated that most of the key enzymes in this pathway were covered by our sequence data. We also detected three genes involved in flavone and flavonol biosynthesis; they were mapped and highlighted onto the “flavone and flavonol biosynthesis”

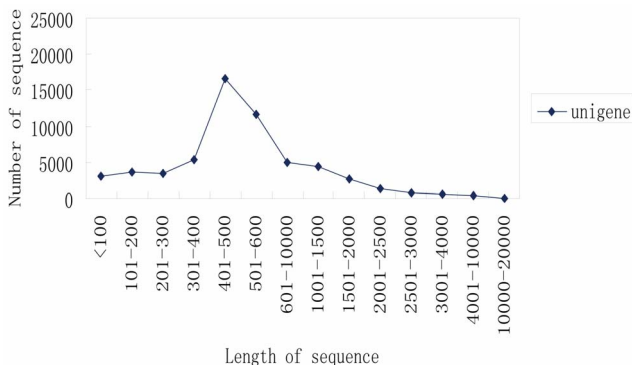

**Figure 2.** Length distributions of peach unigenes. doi:10.1371/journal.pone.0090842.g002

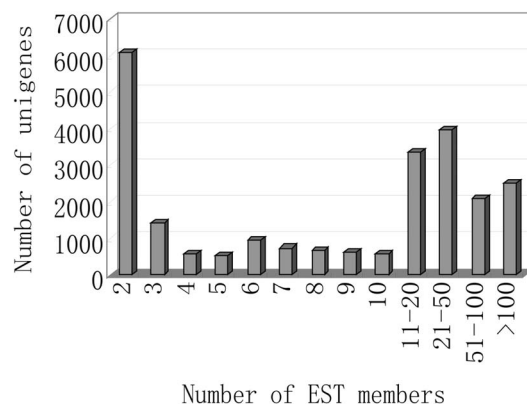

**Figure 3.** Distribution of ESTs in peach unigenes. doi:10.1371/journal.pone.0090842.g003

**Table 2.** Statistics for assembled peach unigenes.

|                                                             | Singleton  | Contig     | Unigene(cluster) |
|-------------------------------------------------------------|------------|------------|------------------|
| Number of sequences                                         | 42,050     | 16,530     | 58,580           |
| Average read length (bp)                                    | 364        | 1,555      | 699              |
| Total bases (bp)                                            | 26,469,716 | 27,763,950 | 40,933,465       |
| Number of unigenes mapped to peach genome predicted genes   | 25,042     | 15,645     | 40,687           |
| Number of unigenes unmapped to peach genome predicted genes | 17,008     | 885        | 17,893           |

doi:10.1371/journal.pone.0090842.t002

pathway (Figure S2). In contrast to the flavonoid biosynthesis pathway, only a small proportion of flavone and flavonol biosynthetic pathway key enzymes were represented by our sequence data.

### Identification of Differentially Expressed Genes in White and Red Flower Petals

In this study, we obtained 16,530 contigs and 42,050 singletons, among which 15,645 contigs and 25,042 singletons were mapped to 16,733 peach predicted genes. There were 855 unmapped contigs and 17,008 unmapped singletons. The purpose of this study was to uncover genes differentially expressed between flower petal colors. The 17,008 unmapped singletons were less closely related to peach genome predicted genes and were not present in sufficient quantities for statistical analysis [50]; they were consequently excluded from the differentially expressed gene analysis. Number of reads was obtained for each gene using a custom PERL script. The digital expression profiling analysis identified 514 genes differentially expressed between red and white flower petals, with  $P < 0.0001$  for all employed statistics (Table S2); 367 of these genes showed significantly higher expression in red flower petals, whereas 147 exhibited significantly higher expression in white petals.

In peach, the flavonoid biosynthetic pathway leads to production of colored pigments. We therefore specifically examined expression of flavonoid structural genes, and identified four differentially expressed genes, all highly expressed in red petals. These genes encode the enzymes chalcone and stilbene synthase (CHS), chalcone-flavanone isomerase (CHI), cinnamate-4-hydrox-

ylase (C4H) and flavanone 3-hydroxylase (F3H). Functionally, C4H catalyzes the incorporation of a 4'-hydroxyl group into cinnamate during p-coumarate formation. CHS condenses one molecule of p-coumaroyl-CoA with three molecules of malonyl-CoA to produce the chalcone tetrahydroxychalcone. (Chalcone is the precursor for all classes of flavonoids, including flavones, flavonols, flavandiols, flavan-4-ols, condensed tannins, isoflavonoids and anthocyanins.) CHI is responsible for the conversion of tetrahydroxychalcone to naringenin, and F3H catalyzes the formation of DHK from naringenin (Figure S3). DHK can be further hydroxylated to form dihydroquercetin (DHQ) and dihydromyricetin (DHM). DHK, DHQ and DHM subsequently lead synthetic branches producing pelargonidin-based (orange to red), cyanidin-based (red to magenta) and delphinidin-based (purple) pigments, respectively. Interestingly, the four differentially expressed genes all mapped to early committed steps on the flavonoid biosynthetic pathway before the formation of DHK (Figure S3). From 454 sequencing, absolute read numbers of *CAH*, *CHS*, *CHI* and *F3H* in red vs. white flower petals were 146:54, 4050:1448, 122:14 and 26:1, respectively. After normalization, expression levels of *CAH*, *CHS*, *CHI* and *F3H* were 3.1-, 3.3-, 10.1- and 30.2-fold higher, respectively, in red flower petals than in white ones.

In the flavonoid biosynthetic pathway, transcription levels of flavonoid biosynthesis genes are regulated by various TFs. TFs related to flavonoid biosynthesis can be divided into three classes: MYB, basic-Helix-Loop-Helix (bHLH) and WD40 [15,51,52]. Apart from the structural genes, we further examined expression levels of these three TF classes. We detected 11 TFs differentially expressed between red and white petals, including 3 bHLHs, 4 MYBs and 4 WD40s. Nine of these TFs were highly expressed in red petals, and two were highly expressed in white petals (Table 3). These DNA-binding proteins interact with promoter regions of target genes and regulate the initiation rate of mRNA synthesis.

Using the differentially expressed structural genes as the test objects, we further validated the digital expression profiling by qRT-PCR technology. Statistically, *CAH*, *CHS*, and *F3H* expressed significantly higher in red flower petals than in white ones, with  $p < 0.05$  (Figure 6). Thus, the significant difference in expression level of these three structural genes was confirmed by both of the analytical techniques. Whereas the expression level of *CHI* was not statistically different between colors. The comparative transcription level of this gene was found to be only slightly higher in red than in white petals by qRT-PCR analysis (Figure 6). Nevertheless, in general, the qRT-PCR results were in rough accordance with the electronic data of gene expression analysis.

### Discussion

Approximately 60% of total predicted genes in the peach genome were covered by the unigenes obtained in this study. In

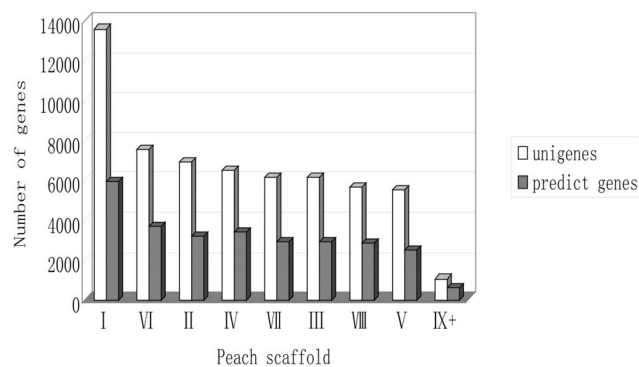

**Figure 4. Distribution of unigenes and predicted genes allocated to each peach genome scaffold.** Roman numerals I–VIII correspond to the eight large scaffolds of the peach genome (v1.0; IPGI), and are ordered along the x-axis with the number of mapped unigenes on each scaffold. IX+ refers to all remaining small scaffolds of the peach genome.

doi:10.1371/journal.pone.0090842.g004

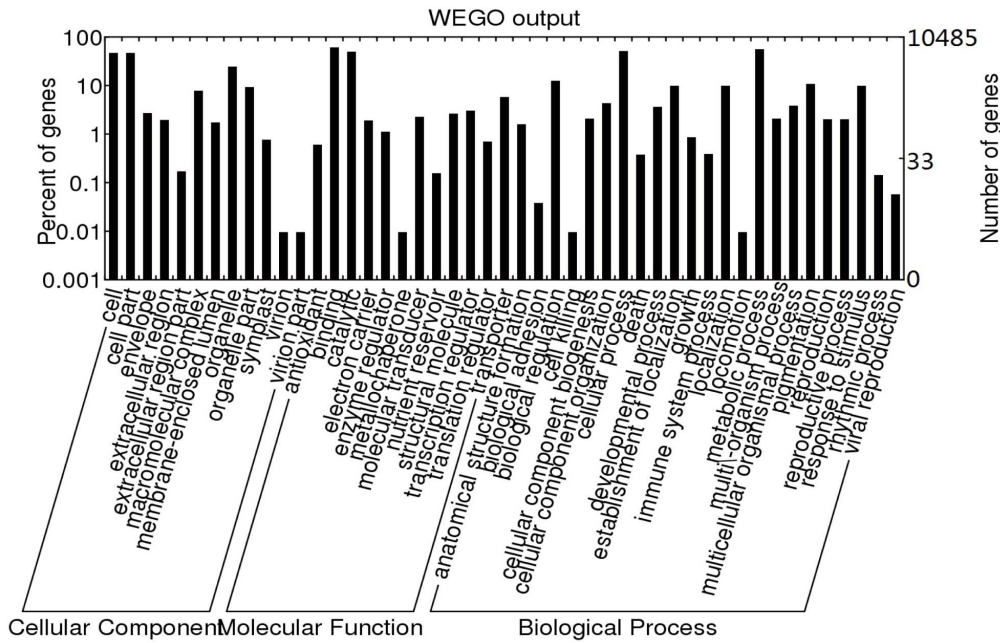

**Figure 5. Number of peach unigenes in each functional category.** Peach unigenes were classified into different functional groups based on a set of plant-specific GO slims within cellular component, molecular function and biological process categories. doi:10.1371/journal.pone.0090842.g005

*Arabidopsis*, approximately 55–67% of genes are expressed in a single tissue based on microarray analysis [53]. In human and mouse, around 60–70% of genes are expressed in a specific tissue [54]. Transcriptomic studies have revealed that about 64%, 66% and 68% of genes are expressed in whole flower tissues of cucumber [55], willow [39] and peach [31], respectively. In our study, we sequenced genes expressed in flower petals, not entire flowers. Our EST collection, designed to capture the majority of genes expressed in peach flower petals, would thus be expected to encompass fewer expressed genes. Because more transcript sequences were generated in peach (1.5 million) than in willow

(1.2 million) [39] or cucumber (0.35 million) [55], the sequence depth of genes covered by our EST dataset should therefore be higher. We thus obtained a reliable dataset to explore differentially expressed genes relevant to variegation in peach flowers. Most differentially expressed genes that have currently been revealed by transcriptome sequencing are derived from studies performed with tissues of different genotypes [39,55,56]. In contrast, ESTs generated in our study are collections of expressed genes of the same genotype. Our approach is thus appropriate for identification of differentially expressed genes relevant to the focal phenotype.

**Table 3. Differentially expressed structural and regulatory genes related to flavonoid pathways in variegated peach flowers.**

| ID         | Function distribution                                         | Highly expressed tissue |
|------------|---------------------------------------------------------------|-------------------------|
| ppa025745m | Chalcone and stilbene synthase (CHS) family protein           | red                     |
| ppa011276m | Chalcone-flavanone isomerase (CHI) family protein             | red                     |
| ppa004544m | cinnamate-4-hydroxylase (C4H)                                 | red                     |
| ppa007636m | flavanone 3-hydroxylase (F3H)                                 | red                     |
| ppa009757m | basic helix-loop-helix (bHLH) DNA-binding superfamily protein | red                     |
| ppa003543m | basic helix-loop-helix (bHLH) DNA-binding superfamily protein | red                     |
| ppa013751m | ILL1 binding bHLH 1                                           | red                     |
| ppa010069m | myb domain protein 113                                        | red                     |
| ppa011751m | myb domain protein 24                                         | red                     |
| ppa010277m | myb domain protein 4                                          | red                     |
| ppa007222m | myb-like transcription factor family protein                  | white                   |
| ppa005673m | Transducin family protein/WD-4 repeat family protein          | red                     |
| ppa005800m | Transducin family protein/WD-4 repeat family protein          | red                     |
| ppa002072m | Transducin/WD4 repeat-like superfamily protein                | red                     |
| ppa014936m | Transducin/WD4 repeat-like superfamily protein                | white                   |

doi:10.1371/journal.pone.0090842.t003

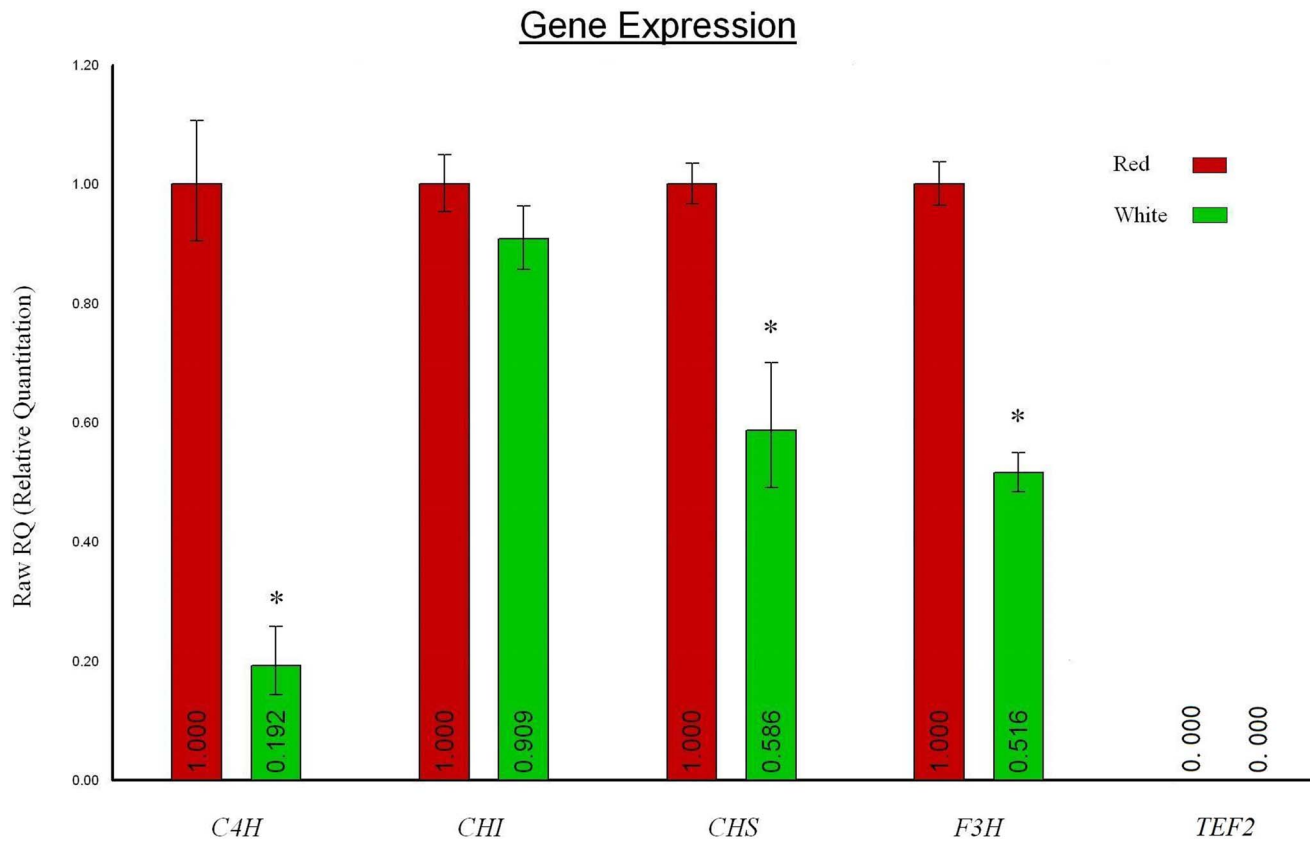

**Figure 6. qRT-PCR analysis of *C4H*, *CHS*, *CHI* and *F3H* gene expression in white and red flower petals.** *TEF2* was used as an internal control for normalization. qRT-PCR data calculated with the  $2^{-\Delta\Delta Ct}$  method [48]. The expression level of each gene in red flower petals was arbitrarily set as 1 and its corresponding transcript level in white flower petals was calibrated against red one. Error bars represent standard error for three independent experimental replicates. \*,  $p < 0.05$ , as determined by one-way ANOVA. doi:10.1371/journal.pone.0090842.g006

The primary pigments related to flower color are anthocyanins, which contribute to a variety of colors, such as red, pink and blue [4]. Biochemical pathway mapping revealed that most of the structural genes in the anthocyanin biosynthetic pathway were covered by our sequence data (Figure S1), and we detected four structural genes highly expressed in red petals. In addition to anthocyanins, some co-pigments, such as flavones and flavonols, can change flower color hues. Only a few structural genes (Figure S2) involved in flavone and flavonol biosynthesis were captured, however, and none of them were differentially expressed between red and white petals. These results suggest that peach flower variegation is linked mainly to anthocyanin biosynthesis, with flavones and flavonols having a limited role.

With respect to enzymatic genes involved in the anthocyanin biosynthetic pathway, *C4H*, *CHS* and *F3H* were confirmed to express at a significantly higher level in red petals than in white petals by both the transcriptome profiling and qRT-PCR analysis. These genes were associated with committed steps before the formation of DHK (Figure S3). Because red flower color in peach is related to the synthesis of pelargonidin-based (orange to red) and cyanidin-based (red to magenta) pigments, our results suggest that the low *C4H*, *CHS* and *F3H* expression levels in white petals reduce DHK formation, thereby inhibiting pelargonidin and cyanidin production. In contrast, the high expression levels of these genes observed in red petals ensure sufficient anthocyanin yields to make flowers red. In this experiment, none of the structural genes downstream of DHK (Figure S3) were found to be

significantly differentially expressed between white and red petals. It can thus be concluded that variegation in peach flowers is related primarily to structural genes upstream of DHK in the anthocyanin synthetic pathway, and is less likely affected by genes downstream.

In nature, white is the most abundantly occurring flower color, and can also be artificially produced from colored flowers. The first successful reversion to white flowers was achieved by suppressing *CHS* in tobacco and petunia [57]. Suppression of structural genes in the anthocyanin synthetic pathway has subsequently proven useful for modifying colored flowers to white. Studies have shown that transgenic plants carrying single gene constructs of *CHS* [58,59] or *F3H* [60] can all exhibit white or faint-colored flowers.

Final anthocyanin concentrations in plant cells are not determined solely by structural gene expression levels; some regulatory genes are clearly also involved in control of flavonoid biosynthesis gene expression. These regulatory genes, typically specific TFs, influence anthocyanin biosynthesis intensity and pattern and generally control expression of many different structural genes [21]. Three classes of TFs—bHLH, MYB and WD40—have been found to be related to flavonoid biosynthesis [15,51,52]. In maize, an MYB-related protein and a bHLH-containing protein have been shown to interact to activate genes in the anthocyanin biosynthetic pathway [61]. In this study, we detected 11 differentially expressed TFs from the three flavonoid biosynthesis-related classes. The high *C4H*, *CHS* and *F3H*

expression levels observed in red peach flower petals may be due to regulation by one or more of these TFs. Although the exact regulatory TFs remain unknown, this study provides an informative list of candidates.

In peach flowers, different variegation patterns are observed: some occur among different flowers on the same branch, while others occur within the same flower (Figure S4). Much genetic evidence supports the hypothesis that flower variegation is caused by transposable elements inserted into structural genes or regulatory elements related to anthocyanin synthesis [26–28]. The different transcript levels detected in this study for structural genes and TFs might be due to insertions of transposable elements. Examination of candidate DNA sequences for transposable element insertions is needed to determine the mechanisms of peach flower variegation. Although transposable elements cannot be detected based solely on transcriptome sequencing, our study has provided some novel insights into the molecular mechanisms underlying variegation in peach flowers.

## Conclusions

Flower color is one of the most attractive characteristics of ornamental plants, and variegated plants are highly valuable in the floricultural market. In this study, we generated a large EST collection from flower petals of a variegated peach. Based on the digital expression analysis, a total of 514 genes were identified to differentially express between red and white flower petals. The red and white petals were collected from the same tree, and they were in the same developmental stage. Moreover, flower coloration was specifically connected with the flavonoid biosynthetic pathway. All these conditions enabled us to narrow down the considerable number of differentially expressed genes to a small number of candidates, which warranted further investigation. Finally, three key structural genes in the anthocyanin biosynthesis pathway were confirmed to express significantly different between colors, and we also detected 11 differentially expressed TFs related to anthocyanin biosynthesis. Our results provide critical information for uncovering candidate genes associated with variegation in peach flowers. We believe this transcriptome dataset will continue to provide unique insights into the molecular mechanisms controlling variegated flower pigmentation, and will eventually help the molecular engineering of variegated plants.

## Supporting Information

**Figure S1 Schematic representation of the flavonoid biosynthesis pathway.** Each box represents a structural gene encoding a key enzyme involved in the flavonoid biosynthesis pathway. Numbers in each box are EC codes of each gene. Genes in red and green boxes represent those captured by our sequence

## References

1. Kevan PG, Baker HG (1983) Insects as flower visitors and pollinators. *Annu Rev Entomol* 28: 407–53.
2. Harborne JB, Williams CA (2000) Advances in flavonoid research since 1992. *Phytochemistry* 55: 481–504.
3. Grotewold EA (2006) The genetics and biochemistry of floral pigments. *Rev. Plant Biol* 57: 761–80.
4. Goto T, Kondo T (1991) Structure and molecular stacking of anthocyanins—flower color variation. *Angew Chem Int Ed Engl* 30: 17–33.
5. Holton TA, Cornish EC (1995) Genetics and biochemistry of anthocyanin biosynthesis. *Plant Cell* 7: 1071–1083.
6. Winkel-Shirley B (2001) Flavonoid biosynthesis: a colorful model for genetics, biochemistry, cell biology, and biotechnology. *Plant Physiol* 126: 485–493.
7. Davies KM (2009) Modifying anthocyanin production in flowers. In *Anthocyanins*. Edited by Winefield C, Davies K, Gould K. New York, Springer, 49–80.

data, with red boxes indicating genes expressed significantly higher in red than in white petals, and green boxes corresponding to genes with insignificant expression differences between colors. Uncolored boxes indicate uncaptured genes. EC code definitions can be found at: [http://www.genome.jp/kegg-bin/show\\_pathway?map00941](http://www.genome.jp/kegg-bin/show_pathway?map00941).

(JPG)

**Figure S2 Schematic representation of the flavone and flavonol biosynthesis pathway.** Each box represents a structural gene encoding a key enzyme involved in the flavone and flavonol biosynthesis pathway. Numbers in each box are EC codes of each gene. Genes in green boxes represent those captured by our sequence data with insignificant expression differences between colors. Uncolored boxes correspond to uncaptured genes. EC code definitions can be found at: [http://www.genome.jp/kegg-bin/show\\_pathway?map00944](http://www.genome.jp/kegg-bin/show_pathway?map00944).

(JPG)

**Figure S3 Mapping of enzymes coded by differentially expressed structural genes to the flavonoid biosynthetic pathway.** Enzymes corresponding to each of the differentially expressed structural genes are outlined in red.

(JPG)

**Figure S4 Natural occurrence of different flower colors in peach (*Prunus persica* f. *versicolor* [Sieb.] Voss).** (A) Flowers having different colors on the same branch. (B) A chimeric flower composed of white and red sections.

(JPG)

**Table S1 Biochemical pathways represented by ESTs from this study.**

(XLS)

**Table S2 Genes differentially expressed between white and red petals from variegated peach flowers in this study.** Structural genes and transcription factors related to flavonoid/anthocyanin biosynthesis are highlighted in red.

(XLS)

**Table S3 Gene-specific primers used in qRT-PCR analysis.** pF represents forward primer and pR represents reverse primer. The primer sequences of *TEF2* were referred to Tong et al. [49].

(DOC)

## Author Contributions

Conceived and designed the experiments: TMY. Performed the experiments: YM HLL. Analyzed the data: YNC YM SXL FXY. Contributed reagents/materials/analysis tools: YM HLL SXL. Wrote the paper: YNC TMY YM FXY SXL.



13. Bruce W, Folkerts O, Garnaat C, Crasta O, Roth B, et al. (2000) Expression profiling of the maize flavonoid pathway genes controlled by estradiol-inducible transcription factors CRC and P. *Plant Cell* 12: 65–80.
14. Morohashi K, Casas MI, Falcone Ferreyra ML, Mejia-Guerra MK, Pourcel L, et al. (2012) A genome-wide regulatory framework identifies maize *pericarp color1* controlled genes. *Plant Cell* 24: 2745–2764.
15. Mol J, Grotewold E, Koes R (1998) How genes paint flowers and seeds. *Trends Plant Sci* 3: 212–217.
16. Forkmann G, de Vlaming P, Spribille R, Wiering H, Schram AW (1986) Genetic and biochemical studies on the conversion of dihydroflavonols to flavonols and flavones of *Petunia hybrida*. *Z Naturforsch C: Biosci* 41c: 179–186.
17. Dixon RA, Lamb CJ, Masoud S, Sewalt VJ, Paiva NL (1996) Metabolic engineering: prospects for crop improvement through the genetic manipulation of phenylpropanoid biosynthesis and defense responses—a review. *Gene* 179: 61–71.
18. Suzuki S, Nishihara M, Nakatsuka T, Misawa N, Ogiwara I, et al. (2007) Flower color alteration in *Lotus japonicus* by modification of the carotenoid biosynthetic pathway. *Plant Cell Rep* 26: 951–959.
19. Davies KM, Albert NW, Schwinn KE (2012) From landing lights to mimicry: the molecular regulation of flower colouration and mechanisms for pigmentation patterning. *Funct Plant Biol* 39: 619–638.
20. Dubois A, Carrere S, Raymond O, Pouvreau B, Cottret L, et al. (2012) Transcriptome database resource and gene expression atlas for the rose. *BMC Genomics* 13: 638.
21. To KY, Wang CK (2006) Molecular breeding of flower color. In *Floriculture, Ornamental and Plant Biotechnology: Advances and Topical Issues Volume I*. Edited by Teixeira da Silva JA. Isleworth, England, 300–310.
22. Iida S, Hirota T, Morisaki T, Marumoto T, Hara T, et al. (2004) Tumor suppressor WARTS ensures genomic integrity by regulating both mitotic progression and G1 tetraploidy checkpoint function. *Oncogene* 23: 5266–5274.
23. van Houwelingen A, Souer E, Spelt K, Kloos D, Mol J, et al. (1998) Analysis of flower pigmentation mutants generated by random transposon mutagenesis in *Petunia hybrida*. *Plant J* 13: 39–50.
24. Iida S, Hoshino A, Johzuka-Hisatomi Y, Habu Y, Inagaki Y (1999) Floricultural traits and transposable elements in the Japanese and common morning glories. *Ann NY Acad Sci* 18: 265–74.
25. Liu D, Galli M, Crawford NM (2001) Engineering variegated floral patterns in tobacco plants using the Arabidopsis transposable element *Tag1*. *Plant Cell Physiol* 42: 419–423.
26. Inagaki Y, Hisatomi Y, Suzuki T, Kasahara K, Iida S (1994) Isolation of a Suppressor-mutator/Enhancer-like, transposable element, *Tpn1*, from Japanese morning glory bearing variegated flowers. *Plant Cell* 6: 375–383.
27. Hoshino A, Inagaki Y, Iida S (1995) Structural analysis of *Tpn1*, a transposable element from Japanese morning glory bearing variegated flowers. *Mol Gen Genet* 247: 114–117.
28. Quattrocchio F, Wing J, van der Woude K, Souer E, deVetten N, et al. (1999) Molecular analysis of the *anthocyanin2* gene of petunia and its role in the evolution of flower color. *Plant Cell* 11: 1433–1444.
29. Chaparro JX, Werner P, Whetten R, O'Malley D (1995) Characterization of an unstable anthocyanin phenotype and estimation of somatic mutation rates in peach. *J. Hered* 86: 186–193.
30. Verde I, Abbott AG, Scalabrini S, Jung S, Shu SQ, et al. (2013) The high-quality draft genome of peach (*Prunus persica*) identifies unique patterns of genetic diversity, domestication and genome evolution. *Nat Genet* 45: 487–494.
31. Wang L, Zhao S, Gu C, Zhou Y, Ma JJ, et al. (2013) Deep RNA-Seq uncovers the peach transcriptome landscape. *Plant Mol Biol* 83: 365–377.
32. Mardis ER (2008) The impact of next-generation sequencing technology on genetics. *Trends Genet* 24: 133–141.
33. Morozova O, Marra MA (2008) Applications of next-generation sequencing technologies in functional genomics. *Genomics* 92: 255–264.
34. Parchman TL, Geist KS, Grahnen JA, Benkman CW, Buerkle CA (2010) Transcriptome sequencing in an ecologically important tree species: assembly, annotation, and marker discovery. *BMC Genomics* 11: 180.
35. Zhang X, Byrnes JK, Gal TS, Li WH, Borevitz JO (2008) Whole genome transcriptome polymorphisms in *Arabidopsis thaliana*. *Genome Biol* 9: R165.
36. Wu B, Li Y, Yan HX, Ma YM, Luo HM, et al. (2012) Comprehensive transcriptome analysis reveals novel genes involved in cardiac glycoside biosynthesis and miRNAs associated with secondary metabolism and stress response in *Digitalis purpurea*. *BMC Genomics* 13: 15.
37. Huang LL, Yang X, Sun P, Tong W, Hu SQ (2012) The first illumina-based *de novo* transcriptome sequencing and analysis of safflower flowers. *PLoS ONE* 7: e38653. doi:10.1371/journal.pone.0038653.
38. Mahomed W, van den Berg N (2011) EST sequencing and gene expression profiling of defence-related genes from *Persea americana* infected with *Phytophthora cinnamomi*. *BMC Plant Biol* 11: 167.
39. Liu J, Yin T, Ye N, Chen Y, Yin T, et al. (2013) Transcriptome analysis of the differentially expressed Genes in the Male and Female Shrub Willows (*Salix suchowensis*). *PLoS ONE* 8: e60181. doi:10.1371/journal.pone.0060181.
40. Quinlan RJ, Tobin JL, Beales PL (2008) Chapter 5 modeling ciliopathies: primary cilia in development and disease. *Curr Top Dev Biol* 84: 249–310.
41. Altschul SF, Gish W, Miller W, Meyers EW, Lipman DJ (1990) Basic local alignment search tool. *J Mol Biol* 215: 403–410.
42. Altschul SF, Madden TL, Schaffer AA, Zhang J, Zhang Z, et al. (1997) Gapped BLAST and PSI-BLAST: a new generation of protein database search programs. *Nucleic Acids Res* 25: 3389–3402.
43. The UniProt Consortium (2008) The Universal Protein Resource (UniProt). *Nucleic Acids Res* 36: D190–D195.
44. Aoki-Kinoshita KF, Kanehisa M (2007) Gene annotation and pathway mapping in KEGG. *Methods Mol Biol* 396: 71–91.
45. Moriya Y, Itoh M, Okuda S, Yoshizawa AC, Kanehisa M (2007) KAAS: an automatic genome annotation and pathway reconstruction server. *Nucleic Acids Res* 35: W182–W185.
46. Stekel DJ, Git Y, Falciani F (2000) The comparison of gene expression from multiple cDNA Libraries. *Genome Res* 10: 2055–2061.
47. Romualdi C, Bortoluzzi S, D'Alessi F, Danieli GA (2003) IDEG6: a web tool for detection of differentially expressed genes in multiple tag sampling experiments. *Physiol Genomics* 12: 159–62.
48. Livak KJ, Schmittgen TD (2001) Analysis of Relative Gene Expression Data Using Real-Time Quantitative PCR and the  $2^{-\Delta\Delta CT}$  Method. *Methods* 25: 402–408.
49. Tong ZG, Gao ZH, Wang F, Zhou J, Zhang Z (2009) Selection of reliable reference genes for gene expression studies in peach using real-time PCR. *BMC Mol Biol* 10: 71.
50. Zhang Z, Wang Y, Wang S, Liu J, Warren W, et al. (2011) Transcriptome analysis of female and male *Xiphophorus maculatus* Jp 163 A. *PLoS ONE* 6: e18379. doi:10.1371/journal.pone.0018379.
51. Broun P (2005) Transcriptional control of flavonoid biosynthesis: a complex network of conserved regulators involved in multiple aspects of differentiation in multiple aspects of in differentiation *Arabidopsis*. *Curr Opin Plant Biol* 8: 272–279.
52. Morita Y, Saitoh M, Hoshino A, Nitasaka E, Iida S (2006) Isolation of cDNAs for R2R3-MYB, bHLH and WDR transcriptional regulators and identification of c and ca mutations conferring white flowers in the Japanese morning glory. *Plant Cell Physiol* 47: 457–470.
53. Schmid M, Davison TS, Henz SR, Pape UJ, Demar M, et al. (2005) A gene expression map of *Arabidopsis thaliana* development. *Nat Genet* 37: 501–506.
54. Ramsköld D, Wang ET, Burge CB, Sandberg R (2009) An abundance of ubiquitously expressed genes revealed by tissue transcriptome sequence data. *PLoS Comput Biol* 5: e1000598. doi:10.1371/journal.pcbi.1000598.
55. Guo SG, Zheng Y, Joung JG, Liu SQ, Zhang ZH, et al. (2010) Transcriptome sequencing and comparative analysis of cucumber flowers with different sex types. *BMC Genomics* 11: 384.
56. Zhu ML, Zheng XC, Shu QY, Li H, Zhong PX, et al. (2012) Relationship between the composition of flavonoids and flower colors variation in tropical water lily (*Nymphaea*) cultivars. *PLoS ONE* 7: e34335. doi:10.1371/journal.pone.0034335.
57. van der Krol AR, Lenting PE, Veenstra J, van der Meer IM, Koes RE, et al. (1988) An antisense chalcone synthase gene in transgenic plants inhibits flower pigmentation. *Nature* 333: 866–869.
58. Napoli C, Lemieux C, Jorgensen R (1990) Introduction of a chimeric chalcone synthase gene into petunia results in reversible co-suppression of homologous genes in trans. *Plant Cell* 2: 279–289.
59. Guttererson N (1995) Anthocyanin biosynthetic genes and their application to flower color modification through sense suppression. *Hort Sci* 30: 964–966.
60. Zuker A, Tzfira T, Ben-Meir H, Ovadis M, Shklarman E, et al. (2002) Modification of flower color and fragrance by antisense suppression of the flavanone 3-hydroxylase gene. *Mol Breeding* 9: 33–41.
61. Schwinn K, Venail J, Shang Y, Mackay S, Alm V, et al. (2006) A small family of MYB-regulatory genes controls floral pigmentation intensity and patterning in the genus *Antirrhinum*. *Plant Cell* 18: 831–851.
